# Supplementary material
Source: bioRxiv or medRxiv preprint supplement (https://medrxiv.org/highwire/filestream/95672/field_highwire_adjunct_files/0/2020.09.03.20168609-1.pdf)

## Supplementary material:

### Personalized Prediction of Disease Activity in Patients with Rheumatoid Arthritis Using an Adaptive Deep Neural Network

Maria Hügler, Ulrich A. Walker, Axel Finckh, Rüdiger Müller, Gabriel Kalweit, Almut Scherer, Joschka Boedecker and Thomas Hügler

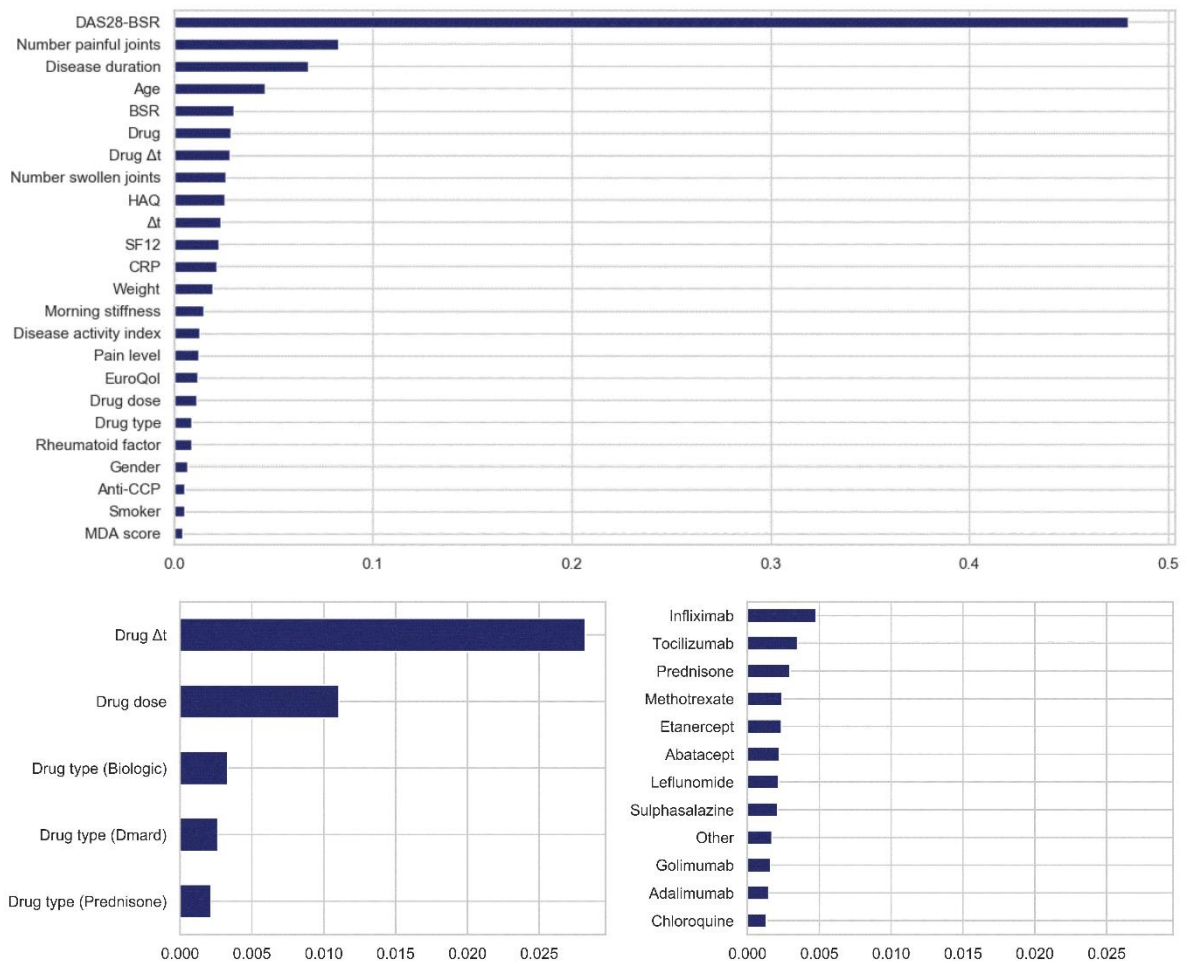

Supplement: Supplementary file [file 2020.09.03.20168609-1.pdf]
